# Supplementary material
Source: PubMed Central journal article supplement (PMC7060827)

Supplemental Digital Content 1, eFigure 1. HALF-PINT Nutrition Guideline

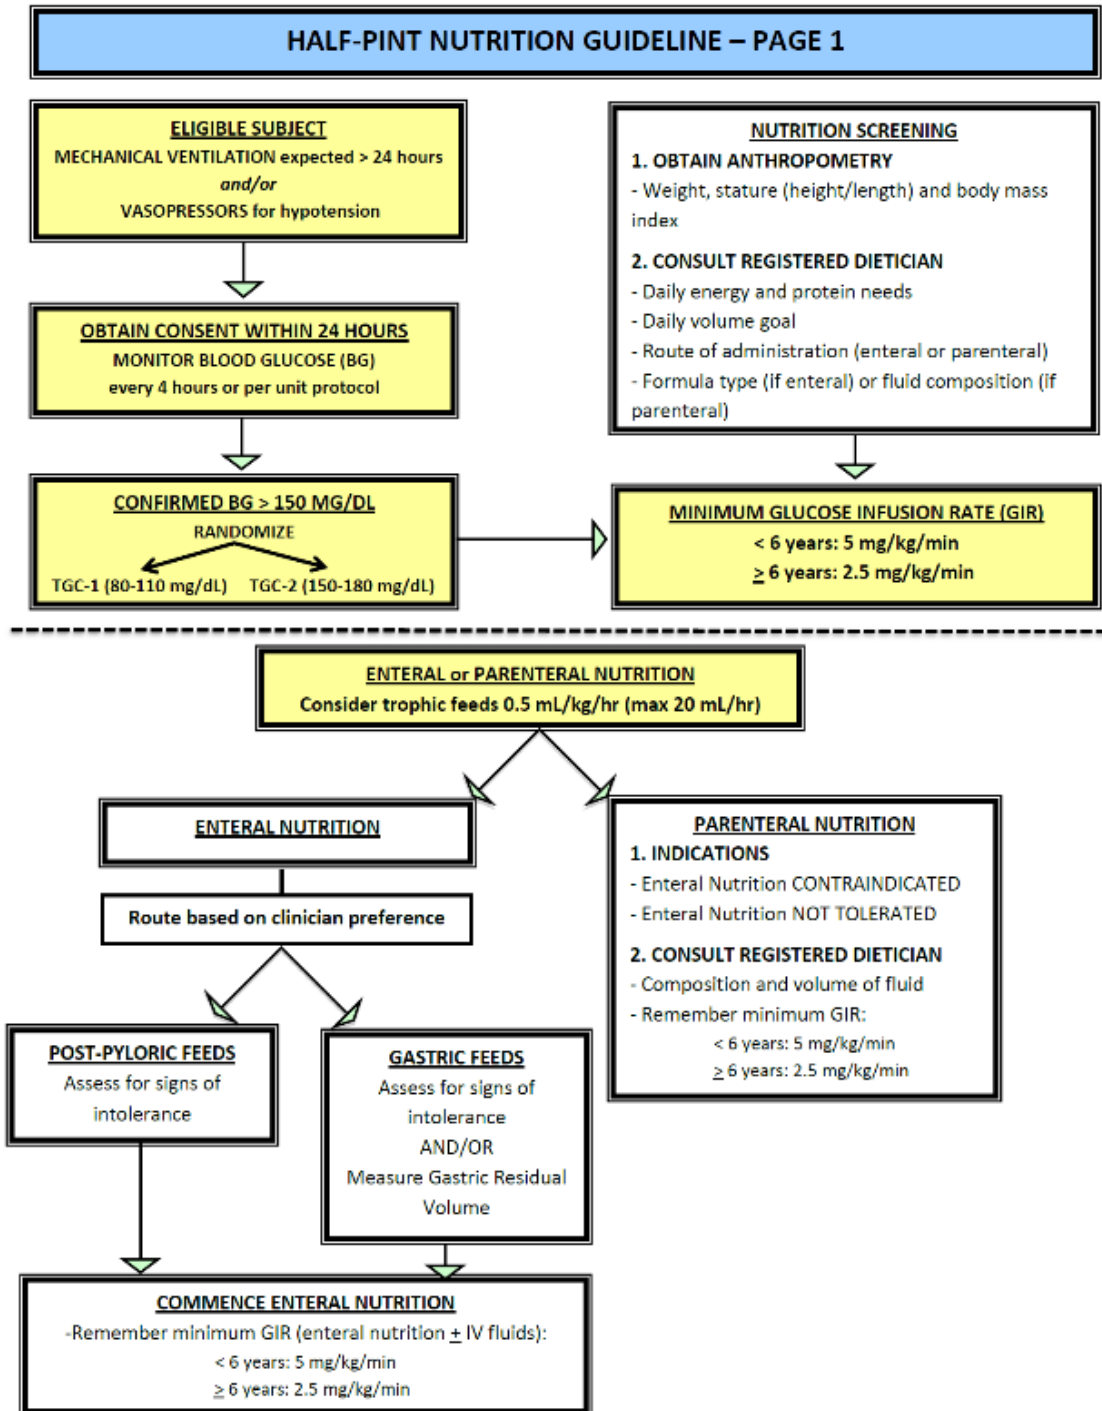

**HALF-PINT NUTRITION GUIDELINE – PAGE 2**

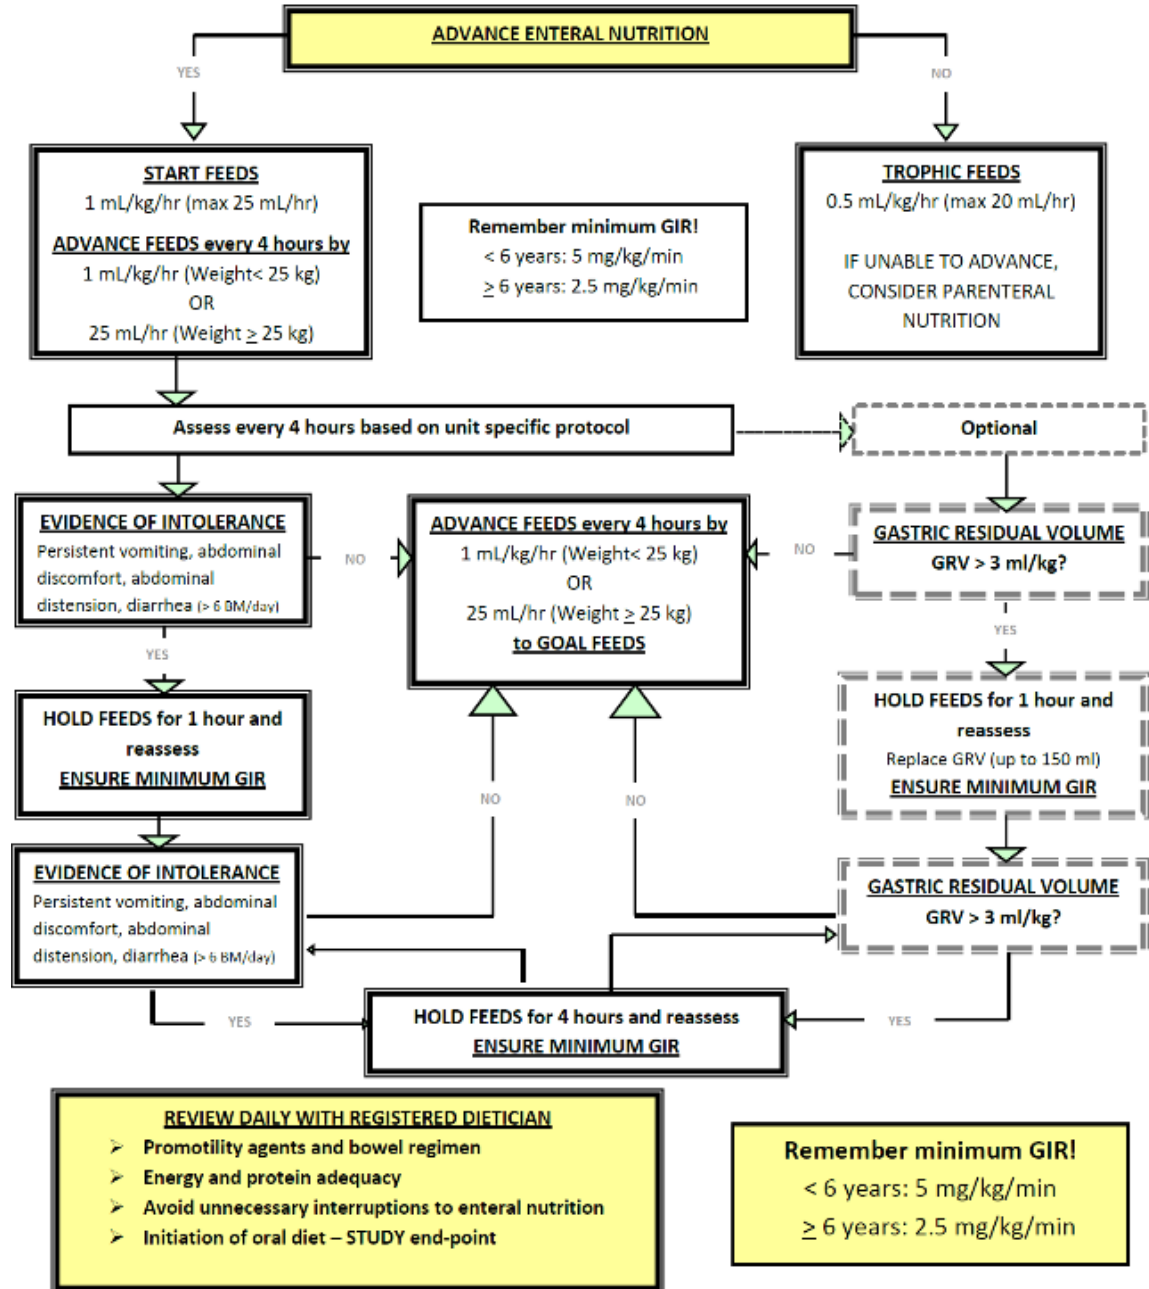

Supplement: NIHMS1536157-supplement-SDC_1.pdf [file NIHMS1536157-supplement-SDC_1.pdf]
