# Supplementary material
Source: PubMed Central journal article supplement (PMC7060827)
Supplement: NIHMS1536157-supplement-SDC_2.pdf [file NIHMS1536157-supplement-SDC_2.pdf]

**Supplemental Digital Content 2, eFigure 2, Average Daily Total Caloric and Protein Intake by Enteral Nutrition Group Through Study Day 8**

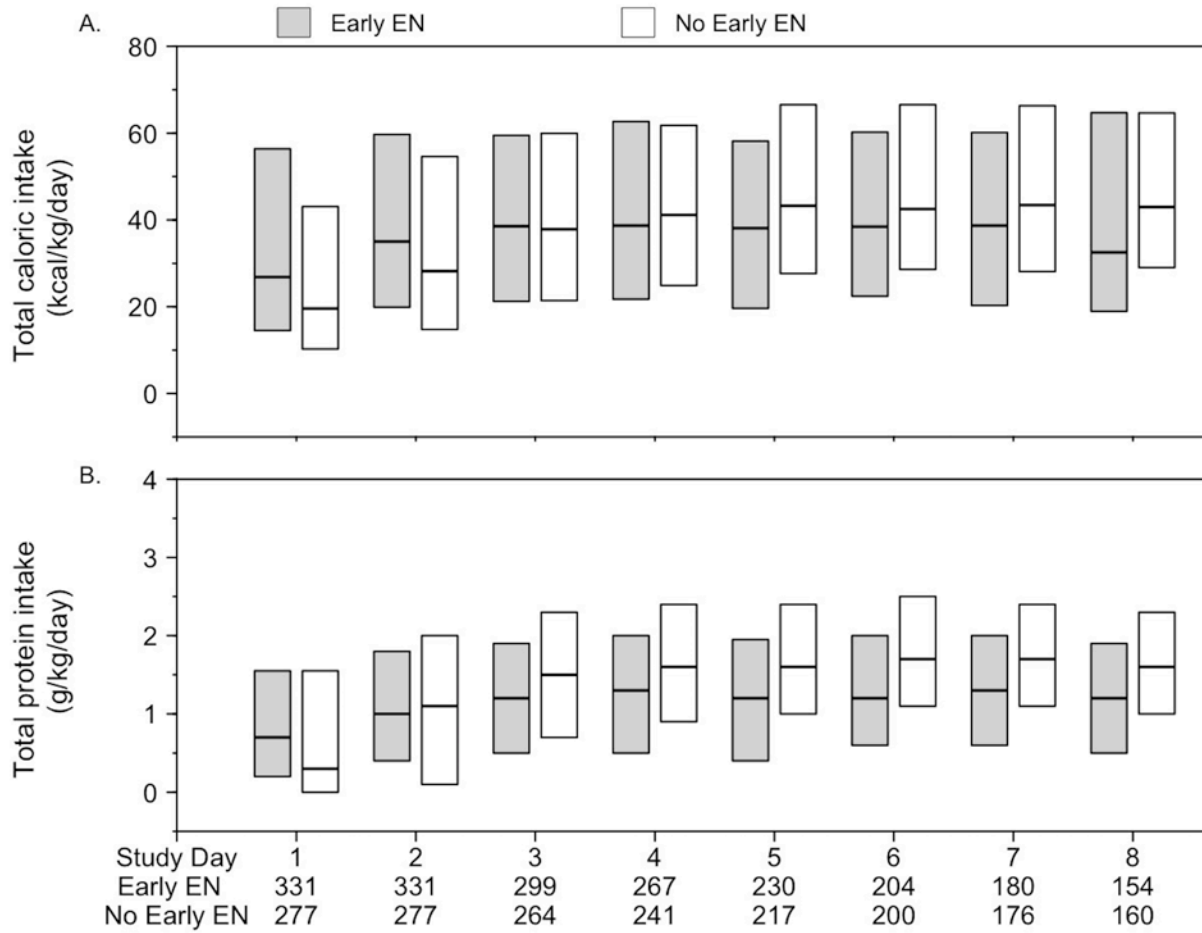

Data are for the first eight study days (median duration of ICU stay). Panel A shows daily total nutrition intake. Panel B shows daily total protein intake. In each panel, the boxes represent the interquartile range and the horizontal lines the median.

EN= Enteral nutrition
