# Supplementary material
Source: PubMed Central journal article supplement (PMC7060827)
Supplement: NIHMS1536157-supplement-SDC_3.pdf [file NIHMS1536157-supplement-SDC_3.pdf]

**Supplemental Digital Content 3, eTable 1. Clinical Outcomes for Patients Who Received Early Enteral Nutrition vs. Late Enteral Nutrition**

| Clinical Outcomes                                        | Early EN<br>( <i>n</i> = 331) | Late EN<br>( <i>n</i> = 199) | Estimate<br>(95% CI) <sup>a</sup>   | <i>p</i> <sup>b</sup> |
|----------------------------------------------------------|-------------------------------|------------------------------|-------------------------------------|-----------------------|
| 90-day hospital mortality, <i>n</i> (%)                  | 25 (8)                        | 28 (14)                      | OR= 0.60<br>(0.29-1.21)             | 0.15                  |
| 28-day hospital mortality, <i>n</i> (%)                  | 23 (7)                        | 17 (9)                       | OR=0.93 <sup>c</sup><br>(0.50-1.73) | 0.83                  |
| ICU-free days (through Day 28), median (IQR)             | 20.2 (9.1-23.7)               | 16.1 (0-21.8)                | HR=1.32<br>(1.09-1.61)              | 0.005                 |
| Hospital-free days (through Day 28), median (IQR)        | 8 (0-17)                      | 0 (0-12)                     | HR=1.49<br>(1.09-2.05)              | 0.01                  |
| Ventilator-free days (through Day 28), median (IQR)      | 21.4 (13.2-24.8)              | 18.3 (5.1-23.0)              | HR=1.32<br>(1.11-1.57)              | 0.002                 |
| Maximum PELOD score (Day 2 through Day 28), median (IQR) | 11 (11-20)                    | 12 (11-22)                   | MD=-3.2<br>(-4.7 to -1.6)           | <0.001                |
| Healthcare-associated infections, <i>n</i> (%)           | 6 (2)                         | 10 (5)                       | OR=0.32 <sup>c</sup><br>(0.12-0.89) | 0.03 <sup>c</sup>     |

CI = confidence interval, EN = enteral nutrition, HR = hazard ratio, ICU = intensive care unit, IQR = interquartile range, MD = mean difference, OR = odds ratio, PELOD = pediatric logistic organ dysfunction.

<sup>a</sup> OR < 1 indicates fewer events; HR > 1 indicates more ICU-free, hospital-free, and ventilator-free days; and MD < 0 indicates lower maximum PELOD scores for the early EN group compared to the late EN group.

<sup>b</sup> Effect estimates and *p* values comparing early EN and late EN groups were calculated with the use of logistic, proportional hazards, or linear regression, as appropriate, adjusting for age category, BMI z-score category, mean vasopressor-inotrope score at randomization, primary reason for ICU admission and PRISM-III score at 12 hours from ICU admission accounting for site as a cluster variable.

<sup>c</sup> Unadjusted odds ratio and *p* value comparing early EN and late EN groups were calculated with the use of univariate logistic regression accounting for site as a cluster variable due to low counts.
