# Supplementary material
Source: PubMed Central journal article supplement (PMC7060827)
Supplement: NIHMS1536157-supplement-SDC_4.pdf [file NIHMS1536157-supplement-SDC_4.pdf]

**Supplemental Digital Content 4, eTable 2. Clinical Outcomes for Patients Enrolled within 48 hrs of ICU Admission By Enteral Nutrition Group**

| Clinical Outcomes                                        | Early EN<br>( <i>n</i> = 213) | No early EN<br>( <i>n</i> = 186) | Estimate<br>(95% CI) <sup>a</sup>   | <i>p</i> <sup>b</sup> |
|----------------------------------------------------------|-------------------------------|----------------------------------|-------------------------------------|-----------------------|
| 90-day hospital mortality, <i>n</i> (%)                  | 17 (8)                        | 28 (15)                          | OR=0.64<br>(0.32-1.27)              | 0.20                  |
| 28-day hospital mortality, <i>n</i> (%)                  | 16 (8)                        | 22 (12)                          | OR=0.81<br>(0.40-1.62)              | 0.54                  |
| ICU-free days (through Day 28), median (IQR)             | 21.1 (12.9-24.0)              | 18.1 (3.4-23.1)                  | HR=1.13<br>(0.91-1.40)              | 0.27                  |
| Hospital-free days (through Day 28), median (IQR)        | 11 (0-19)                     | 3.5 (0-14)                       | HR=1.41<br>(1.06-1.87)              | 0.02                  |
| Ventilator-free days (through Day 28), median (IQR)      | 22.1 (15.8-25.0)              | 19.8 (9.0-23.4)                  | HR=1.17<br>(0.94-1.48)              | 0.16                  |
| Maximum PELOD score (Day 2 through Day 28), median (IQR) | 11 (11-20)                    | 12 (11-21)                       | MD=-1.6<br>(-3.4-0.2)               | 0.08                  |
| Healthcare-associated infections, <i>n</i> (%)           | 1 (<1)                        | 5 (3)                            | OR=0.16 <sup>c</sup><br>(0.02-1.21) | 0.08 <sup>c</sup>     |

CI = confidence interval, EN = enteral nutrition, HR = hazard ratio, ICU = intensive care unit, IQR = interquartile range, MD = mean difference, OR = odds ratio, PELOD = pediatric logistic organ dysfunction.

<sup>a</sup> OR < 1 indicates fewer events; HR > 1 indicates more ICU-free, hospital-free, and ventilator-free days; and MD < 0 indicates lower maximum PELOD scores for the early EN group compared to the no early EN group.

<sup>b</sup> Effect estimates and *p* values comparing early EN and no early EN groups were calculated with the use of logistic, proportional hazards, or linear regression, as appropriate, adjusting for age category, BMI z-score category, mean vasopressor-inotrope score at randomization, primary reason for ICU admission and PRISM-III score at 12 hours from ICU admission accounting for site as a cluster variable.

<sup>c</sup> Unadjusted odds ratio and *p* value comparing early EN and no early EN groups were calculated with the use of univariate logistic regression accounting for site as a cluster variable due to low counts.
